# Supplementary material for: Genetic History of the Altai Breed Horses: From Ancient Times to Modernity
Source: MDPI journal article supplement (doi:10.3390/genes14081523), 2023-07-26
Supplement: s1 [file s1]

**Table S4.** Squared cosines of the variables associated with the principal component analysis factors.

| Name of variable | Name of factor |              |              |              |
|------------------|----------------|--------------|--------------|--------------|
|                  | F1             | F2           | F3           | F4           |
| A                | <b>0.586</b>   | 0.242        | 0.128        | 0.044        |
| B                | 0.268          | <b>0.360</b> | 0.162        | 0.210        |
| C                | <b>0.606</b>   | 0.374        | 0.019        | 0.001        |
| D                | <b>0.726</b>   | 0.194        | 0.012        | 0.068        |
| D3               | 0.254          | 0.085        | <b>0.653</b> | 0.008        |
| E                | <b>0.606</b>   | 0.374        | 0.019        | 0.001        |
| F                | 0.339          | <b>0.472</b> | 0.019        | 0.171        |
| G                | <b>0.606</b>   | 0.374        | 0.019        | 0.001        |
| I                | 0.132          | <b>0.396</b> | 0.341        | 0.130        |
| K                | 0.073          | 0.011        | <b>0.842</b> | 0.074        |
| K3               | 0.300          | 0.001        | 0.137        | <b>0.561</b> |
| X2               | <b>0.428</b>   | 0.303        | 0.206        | 0.062        |
| X3               | <b>0.494</b>   | 0.166        | 0.293        | 0.046        |
| X4               | 0.222          | 0.062        | 0.292        | <b>0.424</b> |
| X5               | <b>0.606</b>   | 0.374        | 0.019        | 0.001        |
| X7               | <b>0.606</b>   | 0.374        | 0.019        | 0.001        |

Values in bold indicate the largest variable squared cosine for each factor.
