# Supplementary material for: Genetic History of the Altai Breed Horses: From Ancient Times to Modernity
Source: MDPI journal article supplement (doi:10.3390/genes14081523), 2023-07-26
Supplement: s1 [file s1]

**Table S5.** AMOVA hierarchical molecular variance distribution (difference between more and less high-altitude groups).

| Source of variation                                 | d.f. (degrees of freedom) | Variance component      | Variance (%) | Fixation index            | <i>P-value</i>    |
|-----------------------------------------------------|---------------------------|-------------------------|--------------|---------------------------|-------------------|
| Between united groups <sup>1</sup>                  | 1                         | 0.13958 Va <sup>2</sup> | 5.71         | F <sub>CT</sub> = 0.05711 | 0.33822 ± 0.01681 |
| Between groups within a priori formed united groups | 1                         | 0.04407 Vb <sup>2</sup> | 1.80         | F <sub>SC</sub> = 0.01912 | 0.09971 ± 0.00834 |
| Within groups                                       | 125                       | 2.26056 Vc <sup>2</sup> | 92.49        | F <sub>ST</sub> = 0.07514 | 0.00684 ± 0.00271 |

<sup>1</sup>United group 1 — Kosh-Agach group, united group 2 — Ulagan groups (“mixed” + gene pool).

<sup>2</sup>Variance component name.

“F<sub>CT</sub>” — Va/(Va+Vb+Vc), the proportion of variation among groups.

“F<sub>SC</sub>” — Vb/(Vb+Vc), the proportion of variation among groups within a priori formed united groups.

“F<sub>ST</sub>” — Va+Vb/(Va+Vb+Vc), the proportion of variation within groups.

**Table S6.** AMOVA hierarchical molecular variance distribution (difference between gene pool and “mixed” groups).

| Source of variation                                 | d.f. (degrees of freedom) | Variance component        | Variance (%) | Fixation index              | <i>P-value</i>    |
|-----------------------------------------------------|---------------------------|---------------------------|--------------|-----------------------------|-------------------|
| Between united groups <sup>1</sup>                  | 1                         | - 0.13427 Va <sup>2</sup> | - 5.71       | F <sub>CT</sub> = - 0.05708 | 1.00000 ± 0.00000 |
| Between groups within a priori formed united groups | 1                         | 0.22599 Vb <sup>2</sup>   | 9.61         | F <sub>SC</sub> = 0.09088   | 0.01857 ± 0.00437 |
| Within groups                                       | 125                       | 2.26056 Vc <sup>2</sup>   | 96.10        | F <sub>ST</sub> = 0.03899   | 0.00978 ± 0.00326 |

<sup>1</sup>United group 1 — gene pool Ulagan group, united group 2 — “mixed” Ulagan group + “mixed” Kosh-Agach group.

<sup>2</sup>Variance component name.

“F<sub>CT</sub>” — Va/(Va+Vb+Vc), the proportion of variation among groups.

“F<sub>SC</sub>” — Vb/(Vb+Vc), the proportion of variation among groups within a priori formed united groups.

“F<sub>ST</sub>” — Va+Vb/(Va+Vb+Vc), the proportion of variation within groups.

**Table S7.** Hierarchical molecular variance distribution according to AMOVA results (difference between the “mixed” Ulagan group and other studied groups).

| Source of variation                                 | d.f. (degrees of freedom) | Variance component        | Variance (%) | Fixation index              | <i>P-value</i>    |
|-----------------------------------------------------|---------------------------|---------------------------|--------------|-----------------------------|-------------------|
| Between united groups <sup>1</sup>                  | 1                         | - 0.09135 Va <sup>2</sup> | - 3.91       | F <sub>CT</sub> = - 0.03907 | 0.66080 ± 0.01542 |
| Between groups within a priori formed united groups | 1                         | 0.16849 Vb <sup>2</sup>   | 7.21         | F <sub>SC</sub> = 0.06936   | 0.01466 ± 0.00340 |

|               |     |                 |       |                    |                       |
|---------------|-----|-----------------|-------|--------------------|-----------------------|
| Within groups | 125 | 2.26056 $V_c^2$ | 96.70 | $F_{ST} = 0.03300$ | $0.00587 \pm 0.00219$ |
|---------------|-----|-----------------|-------|--------------------|-----------------------|

<sup>1</sup>United group 1 — “mixed” Ulagan group, united group 2 — gene pool Ulagan group + “mixed” Kosh-Agach group.

<sup>2</sup>Variance component name.

“ $F_{CT}$ ” —  $V_a/(V_a+V_b+V_c)$ , the proportion of variation among groups.

“ $F_{SC}$ ” —  $V_b/(V_b+V_c)$ , the proportion of variation among groups within a priori formed united groups.

“ $F_{ST}$ ” —  $V_a+V_b/(V_a+V_b+V_c)$ , the proportion of variation within groups.
