# Supplementary material for: Genetic History of the Altai Breed Horses: From Ancient Times to Modernity
Source: MDPI journal article supplement (doi:10.3390/genes14081523), 2023-07-26
Supplement: s1 [file s1]

**Table S1. Information about the samples of ancient and medieval horses of Altai and Mongolia and the results of the analysis of the mitogenome control region of these horses.**

| Name of sample | Geographic origin of sample | GPS coordinates of archaeological site | Name of archaeological culture | Material type of sample           | Nucleotide polymorphisms not in the mutation hotspots (15495–15720 bp fragment) | Nucleotide polymorphisms in the mutation hotspots (15495–15720 bp fragment) | Mitotype                           | Sequence accession № (GenBank) |
|----------------|-----------------------------|----------------------------------------|--------------------------------|-----------------------------------|---------------------------------------------------------------------------------|-----------------------------------------------------------------------------|------------------------------------|--------------------------------|
| DC             | Altai                       | 51.397581, 84.676206                   | – (Paleolithic)                | Tooth                             | 495C, 497T, 526C, 536C, 566C, 602T, 709T, 720A                                  | 597G, 495C, 526C, 566C, 602T, 649G, 720A                                    | X-11+497+536+709-649 (~ X11-group) | OR001883                       |
| Ak2-4          | Altai                       | 49.299718, 87.562500                   | Biiken                         | Trochanter                        | 495C, 602T, 703C, 720A                                                          | 585A, 597G                                                                  | K                                  | OR001888                       |
| Ak2-5          | Altai                       | 49.299718, 87.562500                   | Biiken                         | Trochanter                        | 495C                                                                            | –                                                                           | D2                                 | OR001887                       |
| Ak2-6          | Altai                       | 49.299718, 87.562500                   | Biiken                         | Trochanter                        | 495C, 602T, 703C, 720A, 740G                                                    | 604A                                                                        | K2                                 | OR001886                       |
| Ak1-1          | Altai                       | 49.285356, 87.535506                   | Pazyryk                        | Outer splint                      | 495C, 538G, 602T, 709T, 720A                                                    | 585A, 650G                                                                  | I                                  | OR001884                       |
| Ver1-1         | Altai                       | 49.200060, 87.356356                   | Pazyryk                        | Femur                             | 495C, 601C, 602T, 703C, 720A                                                    | –                                                                           | F+703, K+601                       | OR001885                       |
| Ber2           | Altai                       | 51.253151, 86.070825                   | Pazyryk                        | Tooth                             | 494C, 495C, 496G, 534T, 603C, 649G, 720A                                        | 585A                                                                        | X2b                                | OR001898                       |
| Bi3            | Altai                       | 51.282068, 86.059524                   | Pazyryk                        | Carpus                            | 495C, 521A, 596G, 602T, 720A                                                    | –                                                                           | G1                                 | OR001899                       |
| Bi4            | Altai                       | 51.165778, 86.145278                   | Turkic                         | Pars petrosa of the temporal bone | 495C, 538G, 602T, 709T, 720A                                                    | 597G, 650G                                                                  | I                                  | OR001900                       |
| Ush-7          | Mongolia                    | 49.655567, 99.927100                   | Khareksur and Deer Stone       | Vertebrae cervicales              | 495C, 720A                                                                      | –                                                                           | D                                  | OR001895                       |

|        |          |                       |                          |                                   |                                                |                  |       |          |
|--------|----------|-----------------------|--------------------------|-----------------------------------|------------------------------------------------|------------------|-------|----------|
| Ush-8  | Mongolia | 49.655567, 99.927100  | Khereksur and Deer Stone | Vertebrae cervicales              | 494C, 495C, 496G, 534T, 603C, 649G, 720A       | 585A             | X2b   | OR001896 |
| Ush-10 | Mongolia | 49.655567, 99.927100  | Khereksur and Deer Stone | Vertebrae cervicales              | 495C, 602T, 709T, 720A                         | 597G, 650G       | A+709 | OR001897 |
| Gan-1  | Mongolia | 49.572897, 103.251933 | Khereksur and Deer Stone | Pars petrosa of the temporal bone | 495C, 602T, 617C, 659C, 720A                   | —                | B1    | OR001889 |
| Gan-3  | Mongolia | 49.572897, 103.251933 | Khereksur and Deer Stone | Tooth                             | 495C, 602T, 617C, 659C, 720A                   | —                | B1    | OR001890 |
| Gan-11 | Mongolia | 49.573011, 103.255725 | Khereksur and Deer Stone | Tooth                             | 495C, 542T, 602T, 635T, 666A, 703C, 720A       | 585A, 597G, 650G | X3c1  | OR001891 |
| Gan-14 | Mongolia | 49.575922, 103.250372 | Khereksur and Deer Stone | Tooth                             | 494C, 495C, 496G, 534T, 602T, 603C, 649G, 720A | 585A, 604A       | X2    | OR001892 |
| Gan-18 | Mongolia | 49.575922, 103.250372 | Khereksur and Deer Stone | Tooth                             | 494C, 495C, 496G, 534T, 603C, 649G, 720A       | 585A, 604A       | X2b   | OR001893 |
| Er-1   | Mongolia | 49.541831, 103.259603 | Xiongnu                  | Tooth                             | 495C, 542T, 602T, 635T, 666A, 703C, 720A       | 585A, 597G, 650G | X3c1  | OR001894 |

“number XXX” — nucleotide position in the *Equus caballus* mitogenome (NC\_001640.1) after 15,000 bp.
