# Supplementary material for: Genetic History of the Altai Breed Horses: From Ancient Times to Modernity
Source: MDPI journal article supplement (doi:10.3390/genes14081523), 2023-07-26
Supplement: s1 [file s1]

**Table S3. Identified haplotypes of modern Altai horses studied here.**

| <b>№</b> | <b>Name of sample</b> | <b>Name of group</b> | <b>Gender of horse</b> | <b>Nucleotide variants in the 15495–15720 bp horse mitogenome fragment (NC_001640.1)</b> | <b>Nucleotide variants in the horse mitogenome control region mutation hotspots</b> | <b>Mitogenome control region haplotype</b> | <b>Sequence accession № (GenBank)</b> |
|----------|-----------------------|----------------------|------------------------|------------------------------------------------------------------------------------------|-------------------------------------------------------------------------------------|--------------------------------------------|---------------------------------------|
| 1        | T1_1.1                | gene pool Ulagan     | stallion               | T495C, C602T, T652C, G720A                                                               | A650G                                                                               | A + 652                                    | KT827401.1                            |
| 2        | T1_1.2                | gene pool Ulagan     | mare                   | T495C, C602T, T703C, G720A, A740G                                                        | G585A, G604A                                                                        | K2                                         | KT827420.1                            |
| 3        | T1_1.3                | gene pool Ulagan     | stallion               | T495C, C602T, T703C, G720A, A740G                                                        | G585A, G604A                                                                        | K2                                         | KT827421.1                            |
| 4        | T1_1.5                | gene pool Ulagan     | stallion               | T495C, C602T, T703C, G720A, G726A, A740G                                                 | A597G, G604A                                                                        | K2b                                        | KT827428.1                            |
| 5        | T1_1.6                | gene pool Ulagan     | mare                   | T495C, C602T, T703C, G720A                                                               | A597G, G604A                                                                        | K                                          | KT827429.1                            |
| 6        | T1_2.1                | gene pool Ulagan     | mare                   | T494C, T495C, A496G, C534T, C602T, T603C, A649G, G720A                                   | G585A                                                                               | X2                                         | KT827459.1                            |
| 7        | T1_2.2                | gene pool Ulagan     | mare                   | T495C, C542T, C602T, C635T, G666A, T703C, G720A                                          | G585A, A597G, A650G                                                                 | X3c1                                       | KT827476.1                            |
| 8        | T1_2.3                | gene pool Ulagan     | mare                   | T495C, C584T, T601C, C602T, G720A                                                        | G585A                                                                               | F + 584                                    | KT827415.1                            |
| 9        | T1_3.1                | gene pool Ulagan     | mare                   | T494C, T495C, A496G, C534T, T603C, A649G, G720A                                          | G585A                                                                               | X2b                                        | KT827464.1                            |
| 10       | T1_3.2                | gene pool Ulagan     | mare                   | T495C, C542T, C602T, C635T, G666A, T703C, G720A                                          | G585A, A597G, A650G                                                                 | X3c1                                       | KT827477.1                            |
| 11       | T1_3.3                | gene pool Ulagan     | mare                   | T495C, C602T, A667G, T703C, G720A                                                        | A597G, G604A                                                                        | K3                                         | KT827434.1                            |
| 12       | T1_3.4                | gene pool Ulagan     | mare                   | T494C, T495C, A496G, C534T, T603C, A649G, G720A                                          | G585A                                                                               | X2b                                        | KT827465.1                            |
| 13       | T1_4.2                | gene pool Ulagan     | mare                   | T494C, T495C, A496G, C534T, T603C, A649G, G720A                                          | G585A                                                                               | X2b                                        | KT827466.1                            |
| 14       | T1_4.3                | gene pool Ulagan     | mare                   | T495C, C602T, A667G, T703C, G720A                                                        | A597G, G604A                                                                        | K3                                         | KT827435.1                            |
| 15       | T1_4.4                | gene pool Ulagan     | stallion               | T494C, T495C, A496G, C534T, T603C, A649G, G720A                                          | G585A                                                                               | X2b                                        | KT827467.1                            |
| 16       | T1_5.1                | gene pool Ulagan     | mare                   | T494C, T495C, A496G, C534T, T603C, A649G, G720A                                          | G585A                                                                               | X2b                                        | KT827468.1                            |

|    |         |                     |          |                                                           |                        |         |            |
|----|---------|---------------------|----------|-----------------------------------------------------------|------------------------|---------|------------|
| 17 | T1_5.2  | gene pool<br>Ulagan | mare     | T495C, T526C, A540G, C602T, A649G,<br>C718T, G720A        | G585A                  | X4a     | KT827480.1 |
| 18 | T1_5.4  | gene pool<br>Ulagan | mare     | T495C, C602T, T703C, G720A                                | G585A, A597G           | K       | KT827416.1 |
| 19 | T1_5.5  | gene pool<br>Ulagan | mare     | T495C, C602T, T703C, G720A                                | G585A, A597G           | K       | KT827417.1 |
| 20 | T1_6.2  | gene pool<br>Ulagan | stallion | T495C, T526C, A540G, C602T, A649G,<br>C718T, G720A        | G585A                  | X4a     | KT827481.1 |
| 21 | T2_K99  | gene pool<br>Ulagan | stallion | T495C, C602T, T703C, G720A, A740G                         | G604A                  | K2      | KT827425.1 |
| 22 | T2_K100 | gene pool<br>Ulagan | mare     | T494C, T495C, A496G, C534T, T603C,<br>A649G, G720A        | G585A                  | X2b     | KT827469.1 |
| 23 | T2_K102 | gene pool<br>Ulagan | mare     | T495C, C602T, T703C, G720A                                | G585A, A597G           | K       | KT827418.1 |
| 24 | T2_K104 | gene pool<br>Ulagan | mare     | T494C, T495C, A496G, C534T, C602T,<br>T603C, A649G, G720A | –                      | X2      | KT827458.1 |
| 25 | T2_K105 | gene pool<br>Ulagan | stallion | T495C, C602T, A667G, T703C, G720A                         | G585A, A597G,<br>G604A | K3      | KT827447.1 |
| 26 | T2_K108 | gene pool<br>Ulagan | stallion | T495C, C602T, A667G, T703C, G720A                         | A597G                  | K3      | KT827433.1 |
| 27 | T2_K112 | gene pool<br>Ulagan | mare     | T495C, C602T, T703C, G720A, A740G                         | G585A, G604A           | K2      | KT827423.1 |
| 28 | T2_K113 | gene pool<br>Ulagan | stallion | T495C, C602T, T652C, G720A                                | A650G                  | A + 652 | KT827402.1 |
| 29 | T2_K114 | gene pool<br>Ulagan | stallion | T495C, C602T, T652C, G720A                                | A650G                  | A + 652 | KT827403.1 |
| 30 | T2_K117 | gene pool<br>Ulagan | mare     | T495C, C602T, C635T, A667G, T703C,<br>G720A               | A597G, G604A           | K3a     | KT827454.1 |
| 31 | T2_K119 | gene pool<br>Ulagan | mare     | T495C, C602T, C635T, A667G, T703C,<br>G720A               | A597G, G604A           | K3a     | KT827455.1 |
| 32 | T2_K124 | gene pool<br>Ulagan | stallion | T495C, C602T, T652C, G720A                                | A650G                  | A + 652 | KT827404.1 |
| 33 | T2_K126 | gene pool<br>Ulagan | mare     | T494C, T495C, A496G, C534T, C602T,<br>T603C, A649G, G720A | G585A                  | X2      | KT827460.1 |
| 34 | T3_1.1  | gene pool<br>Ulagan | mare     | T495C, C602T, A667G, T703C, G720A                         | G585A, A597G,<br>G604A | K3      | KT827448.1 |
| 35 | T3_1.3  | gene pool<br>Ulagan | mare     | T495C, C602T, A667G, T703C, G720A                         | A597G, G604A           | K3      | KT827436.1 |
| 36 | T3_1.5  | gene pool           | mare     | T495C, C602T, A667G, T703C, G720A                         | G585A, A597G,          | K3      | KT827449.1 |

|    |        |                     |          |                                                           |                        |     |            |
|----|--------|---------------------|----------|-----------------------------------------------------------|------------------------|-----|------------|
|    |        | Ulagan              |          |                                                           | G604A                  |     |            |
| 37 | T3_1.6 | gene pool<br>Ulagan | stallion | T495C, C602T, A667G, T703C, G720A                         | G585A, A597G,<br>G604A | K3  | KT827450.1 |
| 38 | T3_3.2 | gene pool<br>Ulagan | mare     | T494C, T495C, A496G, C534T, T603C,<br>A649G, G720A        | G585A                  | X2b | KT827470.1 |
| 39 | T3_3.5 | gene pool<br>Ulagan | stallion | T495C, C602T, C635T, A667G, T703C,<br>G720A               | A597G, G604A           | K3a | KT827456.1 |
| 40 | T3_4.1 | gene pool<br>Ulagan | mare     | T494C, T495C, A496G, C534T, T603C,<br>A649G, G720A        | –                      | F   | KT827410.1 |
| 41 | T3_4.4 | gene pool<br>Ulagan | mare     | T495C, C602T, A667G, T703C, G720A                         | A597G, G604A           | K3  | KT827437.1 |
| 42 | T3_4.5 | gene pool<br>Ulagan | stallion | T494C, T495C, A496G, C534T, T603C,<br>A649G, G720A        | G585A                  | X2b | KT827471.1 |
| 43 | T3_5.1 | gene pool<br>Ulagan | mare     | T494C, T495C, A496G, C534T, T603C,<br>A649G, G720A        | –                      | F   | KT827411.1 |
| 44 | T3_5.2 | gene pool<br>Ulagan | mare     | T494C, T495C, A496G, C534T, C602T,<br>T603C, A649G, G720A | G585A                  | X2  | KT827461.1 |
| 45 | T3_5.3 | gene pool<br>Ulagan | stallion | T494C, T495C, A496G, C534T, T603C,<br>A649G, G720A        | G585A                  | X2b | KT827472.1 |
| 46 | T3_5.4 | gene pool<br>Ulagan | mare     | T495C, C602T, A667G, T703C, G720A                         | A597G, G604A           | K3  | KT827438.1 |
| 47 | T3_5.5 | gene pool<br>Ulagan | mare     | T495C, C602T, C635T, A667G, T703C,<br>G720A               | A597G, G604A           | K3a | KT827457.1 |
| 48 | T3_5.6 | gene pool<br>Ulagan | mare     | T495C, C602T, A667G, T703C, G720A                         | A597G, G604A           | K3  | KT827439.1 |
| 49 | T3_6.1 | gene pool<br>Ulagan | mare     | T495C, C602T, A667G, T703C, G720A                         | A597G, G604A           | K3  | KT827440.1 |
| 50 | T3_6.2 | gene pool<br>Ulagan | mare     | T494C, T495C, A496G, C534T, T603C,<br>A649G, G720A        | G585A                  | X2b | KT827473.1 |
| 51 | T3_6.3 | gene pool<br>Ulagan | mare     | T495C, C602T, T703C, G720A, G726A,<br>A740G               | A597G, G604A           | K2b | KT827430.1 |
| 52 | T3_6.4 | gene pool<br>Ulagan | mare     | T495C, C602T, T703C, G720A, G726A,<br>A740G               | A597G, G604A           | K2b | KT827431.1 |
| 53 | T3_6.5 | gene pool<br>Ulagan | mare     | T495C, C602T, A667G, T703C, G720A                         | G585A, A597G,<br>G604A | K3  | KT827451.1 |
| 54 | T3_7.1 | gene pool<br>Ulagan | mare     | T495C, C602T, T703C, G720A, G726A,<br>A740G               | A597G, G604A           | K2b | KT827432.1 |
| 55 | T3_7.2 | gene pool<br>Ulagan | mare     | T495C, C602T, T703C, G720A, A740G                         | G585A, G604A           | K2  | KT827424.1 |

|    |        |                     |          |                                                           |                        |         |            |
|----|--------|---------------------|----------|-----------------------------------------------------------|------------------------|---------|------------|
| 56 | T4_1.1 | gene pool<br>Ulagan | stallion | T495C, 601C, 602T, 720A                                   | –                      | F       | KT827412.1 |
| 57 | T4_1.2 | gene pool<br>Ulagan | mare     | T495C, C602T, T703C, G720A, A740G                         | G604A                  | K2      | KT827426.1 |
| 58 | T4_1.3 | gene pool<br>Ulagan | stallion | T495C, C602T, T703C, G720A, A740G                         | G604A                  | K2      | KT827427.1 |
| 59 | T4_1.4 | gene pool<br>Ulagan | stallion | T494C, T495C, A496G, C534T, C602T,<br>T603C, A649G, G720A | G585A                  | X2      | KT827462.1 |
| 60 | T4_2.2 | gene pool<br>Ulagan | mare     | T495C, C602T, A667G, T703C, G720A                         | A597G, G604A           | K3      | KT827441.1 |
| 61 | T4_2.3 | gene pool<br>Ulagan | mare     | T495C, C602T, A667G, T703C, G720A                         | A597G, G604A           | K3      | KT827442.1 |
| 62 | T4_2.4 | gene pool<br>Ulagan | mare     | T495C, C602T, A667G, T703C, G720A                         | A597G, G604A           | K3      | KT827443.1 |
| 63 | T4_3.1 | gene pool<br>Ulagan | mare     | T495C, C602T, T617C, T659C, G720A                         | –                      | B1      | KT827406.1 |
| 64 | T4_3.3 | gene pool<br>Ulagan | mare     | T495C, C602T, T617C, T659C, G720A                         | –                      | B1      | KT827407.1 |
| 65 | T4_4.1 | gene pool<br>Ulagan | mare     | T495C, C602T, T652C, G720A                                | A650G                  | A + 652 | KT827405.1 |
| 66 | T4_4.3 | gene pool<br>Ulagan | mare     | T494C, T495C, A496G, C534T, C602T,<br>T603C, A649G, G720A | G585A                  | X2      | KT827463.1 |
| 67 | T4_5.1 | gene pool<br>Ulagan | mare     | T495C, C602T, T617C, T659C, G720A                         | –                      | B1      | KT827408.1 |
| 68 | T4_5.2 | gene pool<br>Ulagan | mare     | T495C, C602T, A667G, T703C, G720A                         | G585A, A597G,<br>G604A | K3      | KT827452.1 |
| 69 | T4_5.3 | gene pool<br>Ulagan | stallion | T495C, C602T, T703C, G720A, A740G                         | G585A, G604A           | K2      | KT827422.1 |
| 70 | T4_5.4 | gene pool<br>Ulagan | stallion | T495C, C602T, T617C, T659C, G720A                         | –                      | B1      | KT827409.1 |
| 71 | T4_5.5 | gene pool<br>Ulagan | mare     | T495C, 601C, 602T, 720A                                   | –                      | F       | KT827413.1 |
| 72 | T4_6.1 | gene pool<br>Ulagan | mare     | T495C, C542T, C602T, C635T, G666A,<br>T703C, G720A        | G585A, A597G,<br>A650G | X3c1    | KT827478.1 |
| 73 | T4_6.2 | gene pool<br>Ulagan | mare     | T495C, T601C, C602T, G720A                                | –                      | F       | KT827414.1 |
| 74 | T4_6.3 | gene pool<br>Ulagan | stallion | T495C, C542T, C602T, C635T, G666A,<br>T703C, G720A        | G585A, A597G,<br>A650G | X3c1    | KT827479.1 |
| 75 | T4_6.4 | gene pool           | mare     | T495C, C602T, A667G, T703C, G720A                         | A597G, G604A           | K3      | KT827444.1 |

|    |        |                     |          |                                                                  |                        |          |            |
|----|--------|---------------------|----------|------------------------------------------------------------------|------------------------|----------|------------|
|    |        | Ulagan              |          |                                                                  |                        |          |            |
| 76 | T4_6.5 | gene pool<br>Ulagan | stallion | T495C, C602T, A667G, T703C, G720A                                | G585A, A597G,<br>G604A | K3       | KT827453.1 |
| 77 | T4_7.1 | gene pool<br>Ulagan | mare     | T494C, T495C, A496G, C534T, T603C,<br>A649G, G720A               | G585A                  | X2b      | KT827474.1 |
| 78 | T4_7.2 | gene pool<br>Ulagan | mare     | T495C, C602T, A667G, T703C, G720A                                | A597G, G604A           | K3       | KT827445.1 |
| 79 | T4_7.3 | gene pool<br>Ulagan | mare     | T494C, T495C, A496G, C534T, T603C,<br>A649G, G720A               | G585A                  | X2b      | KT827475.1 |
| 80 | T4_7.4 | gene pool<br>Ulagan | mare     | T495C, C602T, A667G, T703C, G720A                                | A597G, G604A           | K3       | KT827446.1 |
| 81 | T4_7.5 | gene pool<br>Ulagan | mare     | T495C, C602T, T703C, G720A                                       | G585A, A597G           | K        | KT827419.1 |
| 82 | T5_1.1 | “mixed”<br>Ulagan   | mare     | T495C, C602T, T703C, G720A                                       | G585A, A597G           | K        | KT808297.1 |
| 83 | T5_1.2 | “mixed”<br>Ulagan   | stallion | T495C, C602T, T703C, G720A                                       | G585A, A597G           | K        | KT808298.1 |
| 84 | T5_2.1 | “mixed”<br>Ulagan   | stallion | T495C, T526C, A540G, C602T, A649G,<br>C718T, G720A               | G585A                  | X4a      | KT808313.1 |
| 85 | T5_3.1 | “mixed”<br>Ulagan   | –        | T494C, T495C, A496G, C528T, C534T,<br>C602T, T603C, A649G, G720A | –                      | X2 + 528 | KT808310.1 |
| 86 | T5_3.2 | “mixed”<br>Ulagan   | mare     | T495C, C602T, T703C, G720A, A740G                                | G585A, G604A           | K2       | KT808299.1 |
| 87 | T5_4.1 | “mixed”<br>Ulagan   | mare     | T495C, C602T, A667G, T703C, G720A                                | A597G, G604A           | K3       | KT808304.1 |
| 88 | T5_4.2 | “mixed”<br>Ulagan   | stallion | T495C, C602T, A667G, T703C, G720A                                | A597G, G604A           | K3       | KT808305.1 |
| 89 | T6_1.1 | “mixed”<br>Ulagan   | mare     | T495C, A538G, C602T, C709T, G720A                                | G585A, A650G           | I        | KT808294.1 |
| 90 | T6_2.1 | “mixed”<br>Ulagan   | mare     | T495C, C602T, T652C, G720A                                       | A650G                  | A + 652  | KT808288.1 |
| 91 | T6_3.1 | “mixed”<br>Ulagan   | stallion | T495C, C602T, T703C, G720A, A740G                                | G604A                  | K2       | KT808302.1 |
| 92 | T6_4.1 | “mixed”<br>Ulagan   | stallion | T495C, C602T, T703C, G720A, A740G                                | G585A, G604A           | K2       | KT808300.1 |
| 93 | T6_4.2 | “mixed”<br>Ulagan   | mare     | T495C                                                            | –                      | D2       | KT808291.1 |
| 94 | T6_4.3 | “mixed”<br>Ulagan   | stallion | T495C, A538G, C602T, C709T, G720A                                | G585A, A650G           | I        | KT808295.1 |

|     |        |                        |          |                                                           |              |            |            |
|-----|--------|------------------------|----------|-----------------------------------------------------------|--------------|------------|------------|
| 95  | T6_5.1 | “mixed”<br>Ulagan      | mare     | T495C                                                     | –            | D2         | KT808292.1 |
| 96  | T7_1.1 | “mixed”<br>Ulagan      | stallion | T495C, A596G                                              | –            | D2 + 596   | KT808293.1 |
| 97  | T8_1.1 | “mixed”<br>Ulagan      | mare     | T495C, C602T, A667G, T703C, G720A                         | A597G        | K3         | KT808307.1 |
| 98  | T8_1.2 | “mixed”<br>Ulagan      | stallion | T495C, A538G, C602T, C709T, G720A                         | G585A, A650G | I          | KT808296.1 |
| 99  | T8_2.1 | “mixed”<br>Ulagan      | mare     | T494C, T495C, A496G, C534T, C602T,<br>T603C, A649G, G720A | –            | X2         | KT808308.1 |
| 100 | T8_2.2 | “mixed”<br>Ulagan      | stallion | T495C, C542T, C602T, T632C, C635T,<br>G666A, T703C, G720A | A597G, A650G | X3c1 + 632 | KT808311.1 |
| 101 | T8_2.3 | “mixed”<br>Ulagan      | mare     | T495C, C542T, C602T, T632C, C635T,<br>G666A, T703C, G720A | A597G, A650G | X3c1 + 632 | KT808312.1 |
| 102 | T8_3.1 | “mixed”<br>Ulagan      | stallion | T495C, C602T, T703C, G720A, A740G                         | G585A, G604A | K2         | KT808301.1 |
| 103 | T8_3.2 | “mixed”<br>Ulagan      | mare     | T495C, T526C, A540G, C602T, A649G,<br>C718T, G720A        | G585A        | X4a        | KT808314.1 |
| 104 | T8_3.3 | “mixed”<br>Ulagan      | mare     | T495C, T526C, A540G, C602T, A649G,<br>C718T, G720A        | G585A        | X4a        | KT808315.1 |
| 105 | T8_4.1 | “mixed”<br>Ulagan      | stallion | T495C, T526C, A540G, C602T, A649G,<br>C718T, G720A        | G585A        | X4a        | KT808316.1 |
| 106 | T8_4.2 | “mixed”<br>Ulagan      | mare     | T495C, C602T, T652C, G720A                                | A650G        | A + 652    | KT808289.1 |
| 107 | T8_4.3 | “mixed”<br>Ulagan      | –        | T495C, C602T, T652C, G720A                                | A650G        | A + 652    | KT808290.1 |
| 108 | T8_5.1 | “mixed”<br>Ulagan      | –        | T495C, C602T, A667G, T703C, G720A                         | A597G, G604A | K3         | KT808306.1 |
| 109 | T8_5.2 | “mixed”<br>Ulagan      | mare     | T494C, T495C, A496G, C534T, C602T,<br>T603C, A649G, G720A | –            | X2         | KT808309.1 |
| 110 | T8_5.3 | “mixed”<br>Ulagan      | stallion | T495C, C602T, T703C, G720A, G726A,<br>A740G               | A597G, G604A | K2b        | KT808303.1 |
| 111 | KA1    | “mixed” Kosh-<br>Agach | mare     | T495C, C602T, T617C, T659C, G720A                         | G585A        | B1         | KT808272.1 |
| 112 | KA2    | “mixed” Kosh-<br>Agach | mare     | T495C, T526C, A540G, C602T, A649G,<br>C718T, G720A        | G585A        | X4a        | KT808287.1 |
| 113 | KA3    | “mixed” Kosh-<br>Agach | stallion | T494C, T495C, A496G, C534T, C602T,<br>T603C, A649G, G720A | G585A, G604A | X2         | KT808281.1 |
| 114 | KA4    | “mixed” Kosh-          | mare     | T494C, T495C, A496G, G521A, C534T,                        | G585A, G604A | X2 + 521   | KT808283.1 |

|     |      |                    |          |                                                               |              |          |            |
|-----|------|--------------------|----------|---------------------------------------------------------------|--------------|----------|------------|
|     |      | Agach              |          | C602T, T603C, A649G, G720A                                    |              |          |            |
| 115 | KA5  | “mixed” Kosh-Agach | stallion | T495C, T601C, C602T, G720A                                    | –            | F        | KT808274.1 |
| 116 | KA6  | “mixed” Kosh-Agach | mare     | T495C, C602T, A667G, T703C, G720A                             | –            | K3       | KT808277.1 |
| 117 | KA7  | “mixed” Kosh-Agach | mare     | T494C, T495C, A496G, C534T, C602T, T603C, A649G, G720A        | –            | X2       | KT808279.1 |
| 118 | KA8  | “mixed” Kosh-Agach | stallion | T495C, T526C, A540G, C602T, A649G, C718T, G720A               | G585A        | X4a      | KT808286.1 |
| 119 | KA9  | “mixed” Kosh-Agach | stallion | T494C, T495C, A496G, C534T, C602T, T603C, A649G, G720A        | G585A, G604A | X2       | KT808282.1 |
| 120 | KA10 | “mixed” Kosh-Agach | mare     | T494C, T495C, A496G, G521A, C534T, C602T, T603C, A649G, G720A | G585A, G604A | X2 + 521 | KT808284.1 |
| 121 | KA11 | “mixed” Kosh-Agach | mare     | T495C, C602T, T617C, T659C, G720A                             | –            | B1       | KT808270.1 |
| 122 | KA12 | “mixed” Kosh-Agach | mare     | T495C, C602T, T617C, T659C, G720A                             | –            | B1       | KT808271.1 |
| 123 | KA13 | “mixed” Kosh-Agach | stallion | T495C, C602T, T617C, T659C, G720A                             | –            | B1       | KT808272.1 |
| 124 | KA14 | “mixed” Kosh-Agach | stallion | T494C, T495C, A496G, G521A, C534T, C602T, T603C, A649G, G720A | G585A, G604A | X2 + 521 | KT808285.1 |
| 125 | KA15 | “mixed” Kosh-Agach | stallion | T495C, C602T, T703C, G720A, G726A, A740G                      | G585A, G604A | K2b      | KT808276.1 |
| 126 | KA16 | “mixed” Kosh-Agach | stallion | T494C, T495C, A496G, C534T, C602T, T603C, A649G, G720A        | –            | X2       | KT808280.1 |
| 127 | KA17 | “mixed” Kosh-Agach | stallion | T495C, C602T, T703C, G720A, A740G                             | G604A        | K2       | KT808275.1 |
| 128 | KA18 | “mixed” Kosh-Agach | stallion | T495C, C602T, A667G, T703C, G720A                             | A597G        | K3       | KT808278.1 |
