# Supplementary material for: Genetic History of the Altai Breed Horses: From Ancient Times to Modernity
Source: Genes (Basel). 2023 Jul 26;14(8):1523. doi: 10.3390/genes14081523 (PMC10454587; doi:10.3390/genes14081523)
Supplement: Supplementary file 1 [file genes-14-01523-s001.zip]

Archive with 5 entries (5 files):
- File S1. AMOVA hierarchical molecular variance distribution..pdf
- Table S1. Information about the samples of ancient and medieval horses of Altai and Mongolia.pdf
- Table S2. Haplogroup frequencies of the modern horse groups studied here.pdf
- Table S3. Identified haplotypes of modern Altai horses studied here.pdf
- Table S4. Squared cosines of the variables associated with the principal component analysis factors.pdf
